# Supplementary material for: Vietnam’s Water Resources: Current Status, Challenges, and Security Perspective
Source: MDPI journal article supplement (doi:10.3390/su15086441), 2023-04-10
Supplement: s1 [file s1]

**Table S1.** Total average annual rainfall in the basins in the period 1980–2020.

| Basin/River Basin Group         | Basin Area<br>(km <sup>2</sup> ) | Rainfall (mm) |              |            |
|---------------------------------|----------------------------------|---------------|--------------|------------|
|                                 |                                  | Average       | Rainy Season | Dry Season |
| Bang Giang - Ky Cung            | 10,847                           | 1,650         | 1,353        | 297        |
| Red - Thai Binh                 | 88,860/169,000 *                 | 1,650         | 1,341        | 309        |
| Ma                              | 17,653/28,400 *                  | 1,620         | 1,134        | 486        |
| Ca                              | 17,900/27,200 *                  | 1,703         | 1,141        | 588        |
| Huong                           | 3,066                            | 2,600         | 1,950        | 650        |
| Vu Gia - Thu Bon                | 10,035                           | 2,700         | 2,214        | 486        |
| Tra Khuc                        | 3,337                            | 2,642         | 1,945        | 696        |
| Kon - Ha Thanh                  | 3,809                            | 2,111         | 1,554        | 556        |
| Ba                              | 13,417                           | 1,674         | 1,468        | 206        |
| Se San                          | 11,510                           | 1,789         | 1,490        | 298        |
| Srepok                          | 18,230                           | 1,823         | 1,519        | 304        |
| Dong Nai                        | 36,530/44,100 *                  | 2,100         | 1,575        | 525        |
| Cuu Long (Vietnam Mekong)       | 39,945/795,000 *                 | 1,870         | 1,558        | 312        |
| Cai Ninh Hoa                    | 916                              | 1,508         | 1,234        | 274        |
| River basin group in Nha Trang  | 1,732                            | 2,387         | 2,194        | 193        |
| River basin group in Quang Ninh | 1,957                            | 1,897         | 1,509        | 388        |
| River basin group in Quang Binh | 7,188                            | 2,334         | 1,889        | 445        |
| River basin group in Quang Tri  | 3,583                            | 2,353         | 1,982        | 371        |
| River basin group in Southeast  | 6,402                            | 1,310         | 1,183        | 127        |

Note: \* First and second numbers represent the basin area inside Vietnam and whole basin area, respectively. Data source: DWRM, 2022. Report on National Master Plan for Water Resources in the Period 2022-2030 with a Vision to 2050. Archives of Ministry of Natural Resources and Environment (in Vietnamese)

**Table S2.** Seasonal months in the river basin in the period 1980–2020.

| River Basin               | I | II | III | IV | V | VI | VII | VIII | IX | X | XI | XII |
|---------------------------|---|----|-----|----|---|----|-----|------|----|---|----|-----|
| Bang Giang - Ky Cung      |   |    |     |    |   |    |     |      |    |   |    |     |
| Red - Thai Binh           |   |    |     |    |   |    |     |      |    |   |    |     |
| Ma                        |   |    |     |    |   |    |     |      |    |   |    |     |
| Ca                        |   |    |     |    |   |    |     |      |    |   |    |     |
| Huong                     |   |    |     |    |   |    |     |      |    |   |    |     |
| Vu Gia - Thu Bon          |   |    |     |    |   |    |     |      |    |   |    |     |
| Tra Khuc                  |   |    |     |    |   |    |     |      |    |   |    |     |
| Kone                      |   |    |     |    |   |    |     |      |    |   |    |     |
| Ba                        |   |    |     |    |   |    |     |      |    |   |    |     |
| Se San                    |   |    |     |    |   |    |     |      |    |   |    |     |
| Srepok                    |   |    |     |    |   |    |     |      |    |   |    |     |
| Dong Nai                  |   |    |     |    |   |    |     |      |    |   |    |     |
| Cuu Long (Vietnam Mekong) |   |    |     |    |   |    |     |      |    |   |    |     |
| Cai - Ninh Hoa            |   |    |     |    |   |    |     |      |    |   |    |     |
| Cai - Nha Trang           |   |    |     |    |   |    |     |      |    |   |    |     |
| Quang Ninh RG             |   |    |     |    |   |    |     |      |    |   |    |     |
| Quang Binh RG             |   |    |     |    |   |    |     |      |    |   |    |     |
| Gianh                     |   |    |     |    |   |    |     |      |    |   |    |     |

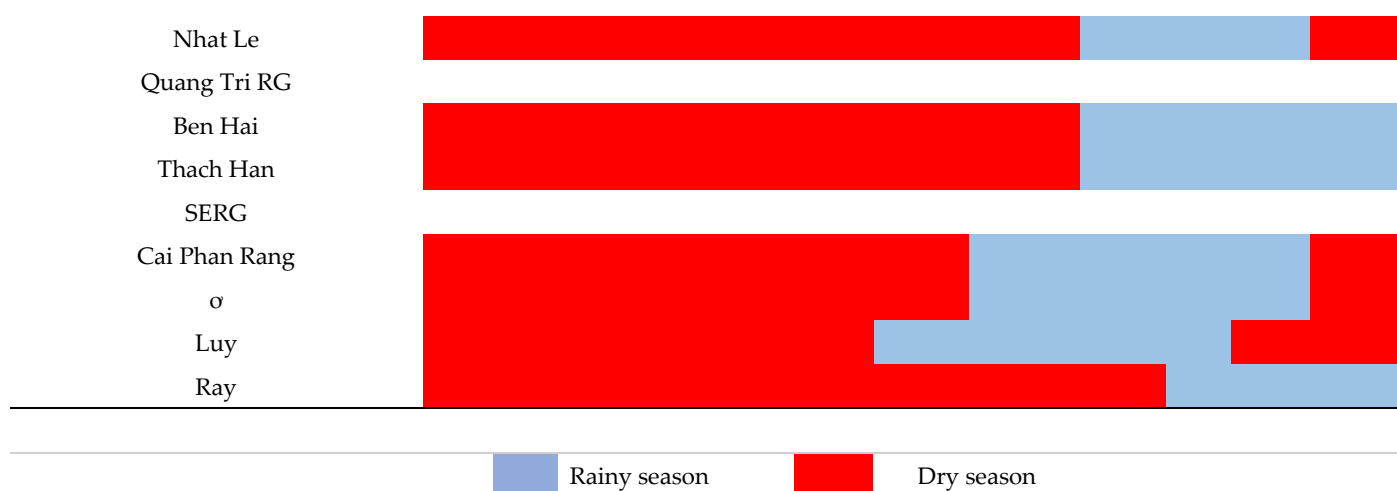

Data source: Data source: DWRM, 2022. Report on National Master Plan for Water Resources in the Period 2022-2030 with a Vision to 2050. Archives of Ministry of Natural Resources and Environment (in Vietnamese).

**Table S3.** Total average annual discharge in the basins in the period 1980–2020.

| Basin/River Basin Group            | Basin Area     |     | Total Average Annual Discharge |                                    |     |                                                  | Total<br>(Mil. m³) |
|------------------------------------|----------------|-----|--------------------------------|------------------------------------|-----|--------------------------------------------------|--------------------|
|                                    | Inside Vietnam |     | Whole<br>Basin<br>(Km²)        | Originating From<br>Inside Vietnam |     | Originating From<br>Outside Vietnam<br>(Mil. m³) |                    |
|                                    | (km²)          | (%) |                                | (Mil. m³)                          | (%) |                                                  |                    |
| Bang Giang - Ky Cung               | 10,847         | 100 |                                | 8,610                              |     |                                                  | 8,610              |
| Red - Thai Binh                    | 88,860         | 53  | 169,000                        | 100,027                            | 67  | 48,300                                           | 148,327            |
| Ma                                 | 17,653         | 62  | 28,400                         | 13,462                             | 68  | 6,260                                            | 19,722             |
| Ca                                 | 17,900         | 66  | 27,200                         | 19,749                             | 83  | 4,110                                            | 23,859             |
| Huong                              | 3,066          | 100 |                                | 8,212                              |     |                                                  | 8,212              |
| Vu Gia - Thu Bon                   | 10,035         | 100 |                                | 19,347                             |     |                                                  | 19,347             |
| Tra Khuc                           | 3,337          | 100 |                                | 8,371                              |     |                                                  | 8,371              |
| Kon - Ha Thanh                     | 3,809          | 100 |                                | 4,742                              |     |                                                  | 4,742              |
| Ba                                 | 13,417         | 100 |                                | 12,045                             |     |                                                  | 12,045             |
| Se San                             | 11,510         | 60  | 19,031                         | 12,836                             |     |                                                  | 12,836             |
| Srepok                             | 18,230         | 59  | 30,841                         | 18,396                             |     |                                                  | 18,396             |
| Dong Nai                           | 36,530         | 83  | 44,100                         | 38,055                             | 95  | 1,925                                            | 39,980             |
| Cuu Long (Vietnam Mekong)          | 39,945         | 5   | 795,000                        | 30,304                             | 6   | 443,840                                          | 474,144            |
| Cai Ninh Hoa                       | 916            | 100 |                                | 0,766                              |     |                                                  | 0,766              |
| River basin group in Nha Trang     | 1,732          | 100 |                                | 3,192                              |     |                                                  | 3,192              |
| River basin group in Quang Ninh    | 1,957          | 100 |                                | 2,762                              |     |                                                  | 2,762              |
| River basin group in Quang Binh    | 7,160          | 100 |                                | 10,109                             |     |                                                  | 10,109             |
| River basin group in Quang Tri     | 3,650          | 100 |                                | 4,667                              |     |                                                  | 4,667              |
| River basin group in Southeast     | 6,402          | 100 |                                | 3,307                              |     |                                                  | 3,307              |
| River basin group in Central coast | 17,029         | 100 |                                | 20,964                             |     |                                                  | 20,964             |
| Total                              |                |     |                                | 339,157                            |     | 504,435                                          | 843,592            |

Data source: DWRM, 2022. Report on National Master Plan for Water Resources in the Period 2022-2030 with a Vision to 2050 (Draft version). Archives of Ministry of Natural Resources and Environment (in Vietnamese).

**Table S4.** Total average annual discharge in rainy and dry seasons in the basins in the period 1980–2020.

| River Basin/River Basin Group      | In Rainy Season                          | In Dry Season                            | Total Smallest Discharge In 3 Months                   | Smallest Discharge in A Month             |
|------------------------------------|------------------------------------------|------------------------------------------|--------------------------------------------------------|-------------------------------------------|
|                                    | W <sub>r</sub><br>(Mil. m <sup>3</sup> ) | W <sub>d</sub><br>(Mil. m <sup>3</sup> ) | W <sup>3</sup> <sub>ms</sub><br>(Mil. m <sup>3</sup> ) | W <sub>ms</sub><br>(Mil. m <sup>3</sup> ) |
| Bang Giang - Ky Cung               | 6,397                                    | 2,213                                    | 412                                                    | 99                                        |
| Red - Thai Binh                    | 111,586                                  | 36,741                                   | 8,997                                                  | 2,775                                     |
| Ma                                 | 14,483                                   | 5,239                                    | 1,471                                                  | 469                                       |
| Ca                                 | 15,785                                   | 8,074                                    | 2,589                                                  | 812                                       |
| Huong                              | 6,034                                    | 2,178                                    | 661                                                    | 159                                       |
| Thu Bon -Vu Gia                    | 12,051                                   | 7,297                                    | 1,554                                                  | 399                                       |
| Tra Khuc                           | 6,106                                    | 2,265                                    | 570                                                    | 152                                       |
| Kone                               | 3,360                                    | 1,382                                    | 243                                                    | 65                                        |
| Ba                                 | 7,562                                    | 4,483                                    | 1,044                                                  | 277                                       |
| Se San                             | 9,246                                    | 3,590                                    | 842                                                    | 254                                       |
| Srepok                             | 14,222                                   | 4,175                                    | 747                                                    | 198                                       |
| Dong Nai                           | 31,242                                   | 8,738                                    | 1,741                                                  | 465                                       |
| Cuu Long (Vietnam Mekong)          | 336,927                                  | 137,218                                  | 31,688                                                 | 9,285                                     |
| Cai Ninh Hoa                       | 615                                      | 152                                      | 35                                                     | 9                                         |
| River basin group in Nha Trang     | 1,988                                    | 1,204                                    | 367                                                    | 105                                       |
| River basin group in Quang Ninh    | 1,925                                    | 838                                      | 165                                                    | 47                                        |
| River basin group in Quang Binh    | 7,505                                    | 2,604                                    | 495                                                    | 156                                       |
| River basin group in Quang Tri     | 3,583                                    | 1,085                                    | 268                                                    | 73                                        |
| River basin group in Southeast     | 2,287                                    | 1,020                                    | 204                                                    | 55                                        |
| River basin group in Central coast | 13,746                                   | 7,218                                    | 1,375                                                  | 381                                       |

Data source: DWRM, 2022. Report on National Master Plan for Water Resources in the Period 2022–2030 with. Archives of Ministry of Natural Resources and Environment (in Vietnamese).

**Table S5.** Current groundwater potential and exploitable groundwater potential in river basins.

| River Basin                            | Groundwater Potential<br>(Mil. m <sup>3</sup> /year) |            |        | Exploitable Groundwater<br>Potential (Mil. m <sup>3</sup> /year) |
|----------------------------------------|------------------------------------------------------|------------|--------|------------------------------------------------------------------|
|                                        | Fresh Water                                          | Salt Water | Total  |                                                                  |
| Bang Giang - Ky Cung                   | 1,154                                                | -          | 1,154  | 346                                                              |
| Red - Thai Binh                        | 19,070                                               | 3,045      | 22,115 | 6,516                                                            |
| Ma                                     | 5,316                                                | 265        | 5,581  | 1,670                                                            |
| Ca                                     | 5,093                                                | 479        | 5,572  | 1,532                                                            |
| Huong                                  | 1,044                                                | 116        | 1,160  | 313                                                              |
| Thu Bon - Vu Gia                       | 1,657                                                | 90         | 1,748  | 494                                                              |
| Tra Khuc                               | 596                                                  | 63         | 659    | 174                                                              |
| Kone                                   | 444                                                  | 34         | 478    | 138                                                              |
| Ba                                     | 2,008                                                | 33         | 2,041  | 747                                                              |
| Se San                                 | 1,327                                                | -          | 1,327  | 393                                                              |
| Srepok                                 | 3,481                                                | -          | 3,481  | 1,370                                                            |
| Dong Nai                               | 9,278                                                | 2,406      | 11,685 | 3,024                                                            |
| Cuu Long (Vietnam Mekong river)        | 10,346                                               | 15,525     | 25,872 | 3,104                                                            |
| Cai - Ninh Hoa                         | 79                                                   | 12         | 91     | 24                                                               |
| Cai - Nha Trang                        | 248                                                  | 34         | 282    | 78                                                               |
| River basin group in Quang Ninh        | 891                                                  | -          | 891    | 267                                                              |
| River basin group in Quang Binh        | 2,071                                                | 8          | 2,079  | 621                                                              |
| River basin group in Quang Tri         | 848                                                  | -          | 848    | 255                                                              |
| River basin group in Southeast Vietnam | 1,033                                                | 61         | 1,094  | 325                                                              |
| River basin group in Central coast     | 3,111                                                | 245        | 3,356  | 947                                                              |
| Total                                  | 69,098                                               | 22,418     | 91,515 | 22,338                                                           |

Data source: Vu Thanh Tam et al., 2018. Project report "Compiling a map of groundwater resources at 1:200,000 scale for provinces nationwide". Archives of National Center for Water Resources Planning and Investigation (in Vietnamese).

**Table S6.** Total volume of surface water exploited and used in river basins in 2015 (mil. m<sup>3</sup>/year).

| Basin                              | Agriculture | Industry | Domestic | Others | Total  |
|------------------------------------|-------------|----------|----------|--------|--------|
| Bang Giang - Ky Cung               | 241         | 101      | 19       | 88     | 450    |
| Red - Thai Binh                    | 16,415      | 1,111    | 672      | 1,910  | 20,108 |
| Ma                                 | 1,686       | 106      | 119      | 144    | 2,055  |
| Ca                                 | 2,539       | 30       | 175      | 51     | 2,795  |
| Huong                              | 310         | 32       | 37       | 11     | 390    |
| Thu Bon - Vu Gia                   | 484         | 49       | 23       |        | 557    |
| Tra Khuc                           | 799         | 23       | 25       | 156    | 1,004  |
| Kone                               | 1,837       | 9        | 106      |        | 1,951  |
| Ba                                 | 1,071       | 20       | 31       | 2      | 1,124  |
| Se San                             | 489         | 11       | 15       | 1      | 516    |
| Srepok                             | 244         | 16       | 6        |        | 266    |
| Dong Nai                           | 8,617       | 4,880    | 336      | 2,055  | 15,888 |
| Cuu Long (Vietnam Mekong)          | 16,275      | 170      | 340      | 3,490  | 20,275 |
| River basin group in Quang Ninh    | 1,222       | 381      | 124      |        | 1,727  |
| River basin group in Central coast | 465         | 41       | 56       | 30     | 592    |
| River basin group in Southeast     | 7,232       | 81       | 61       | 127    | 7,502  |
| Total                              | 59,926      | 7,061    | 2,146    | 8,066  | 77,199 |

Data source: DWRM, 2022. Report on National Master Plan for Water Resources in the Period 2022-2030 with Vision to 2050. Archives of Ministry of Natural Resources and Environment (in Vietnamese).
